# Supplementary material
Source: PubMed Central journal article supplement (PMC5592833)

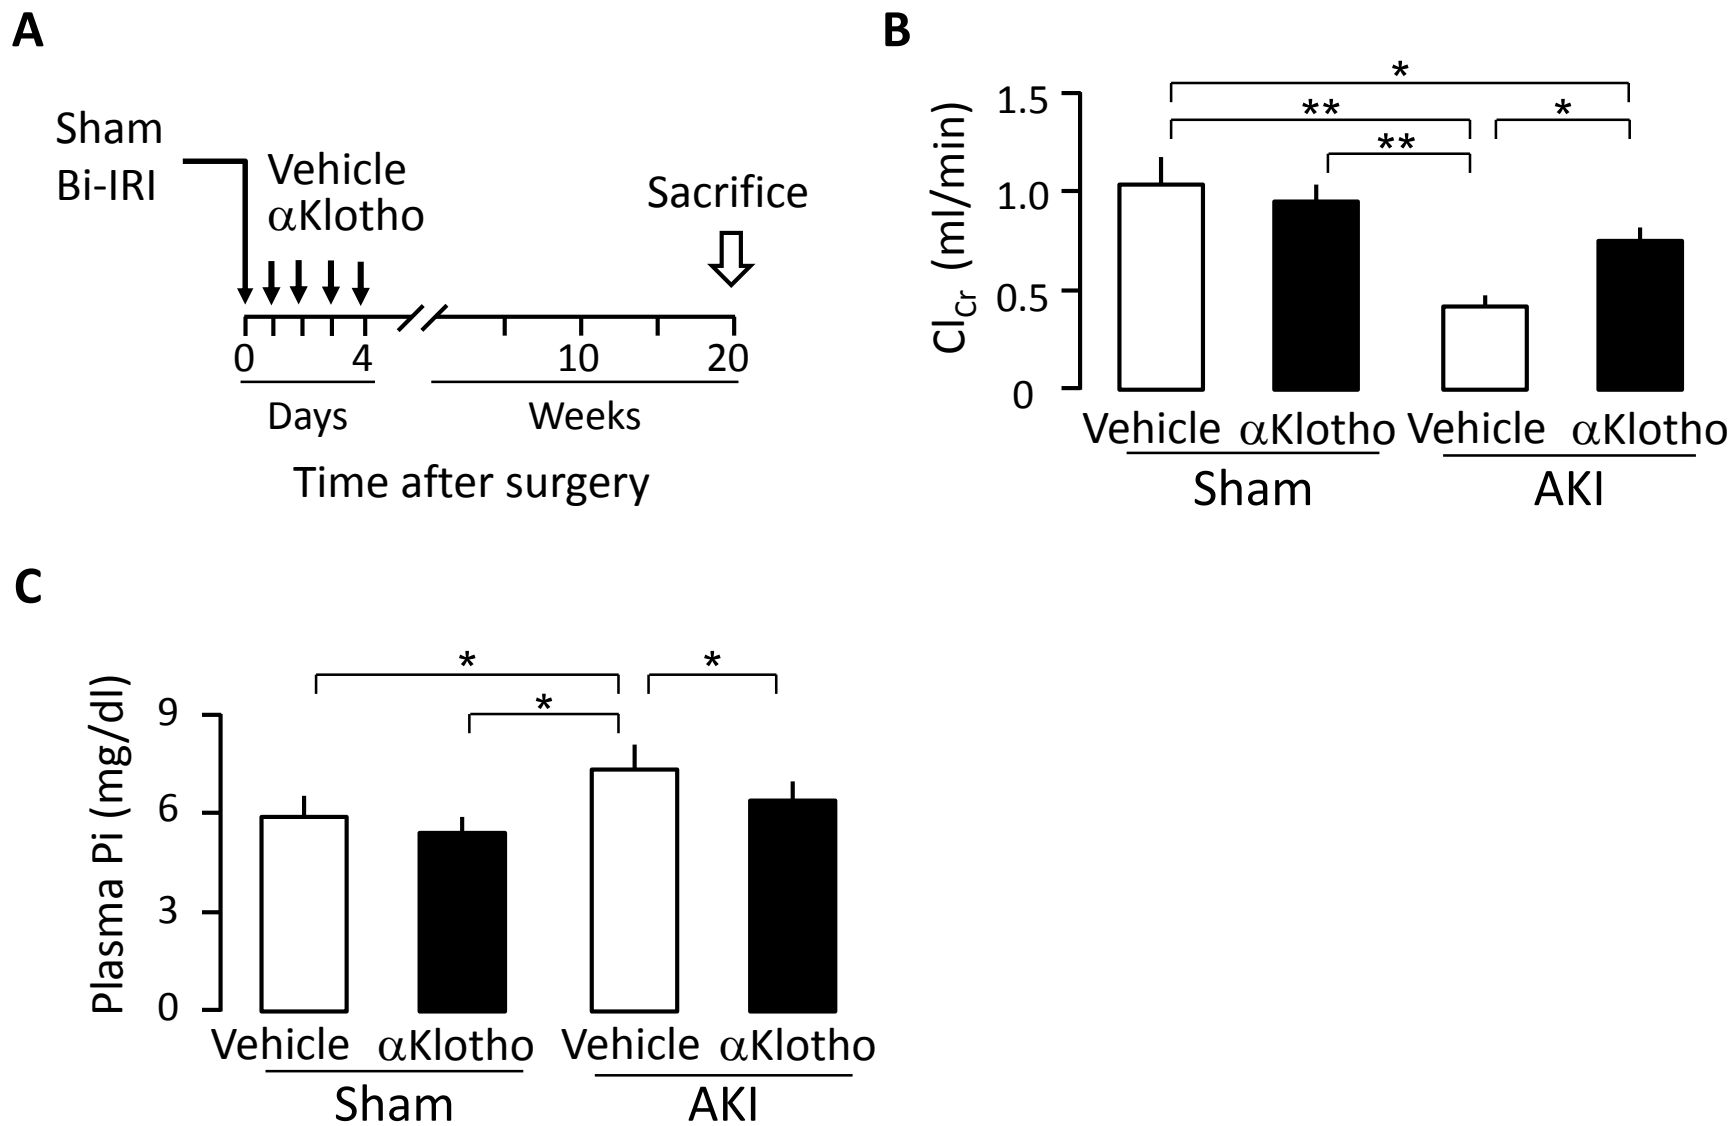

**Supplemental Figure 1**

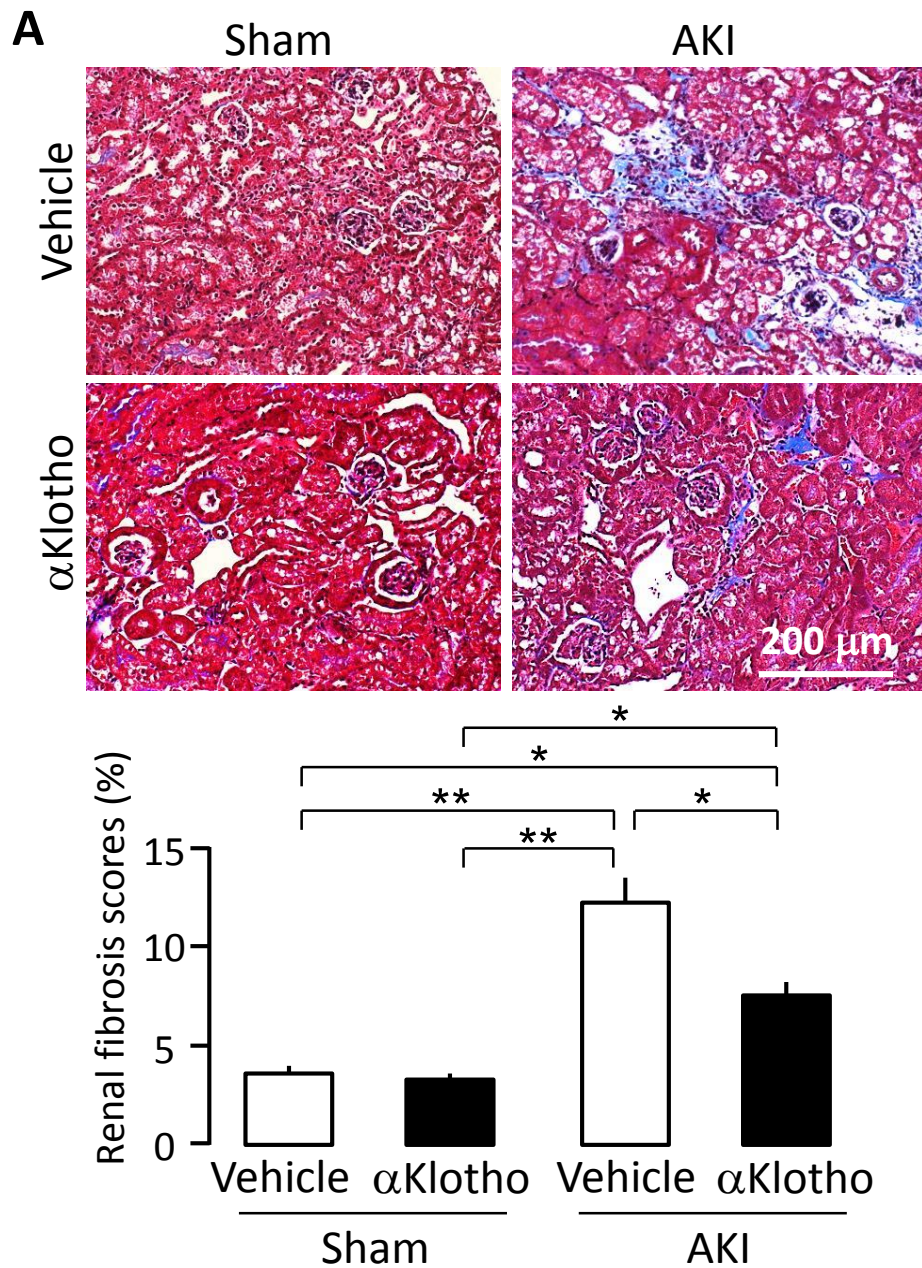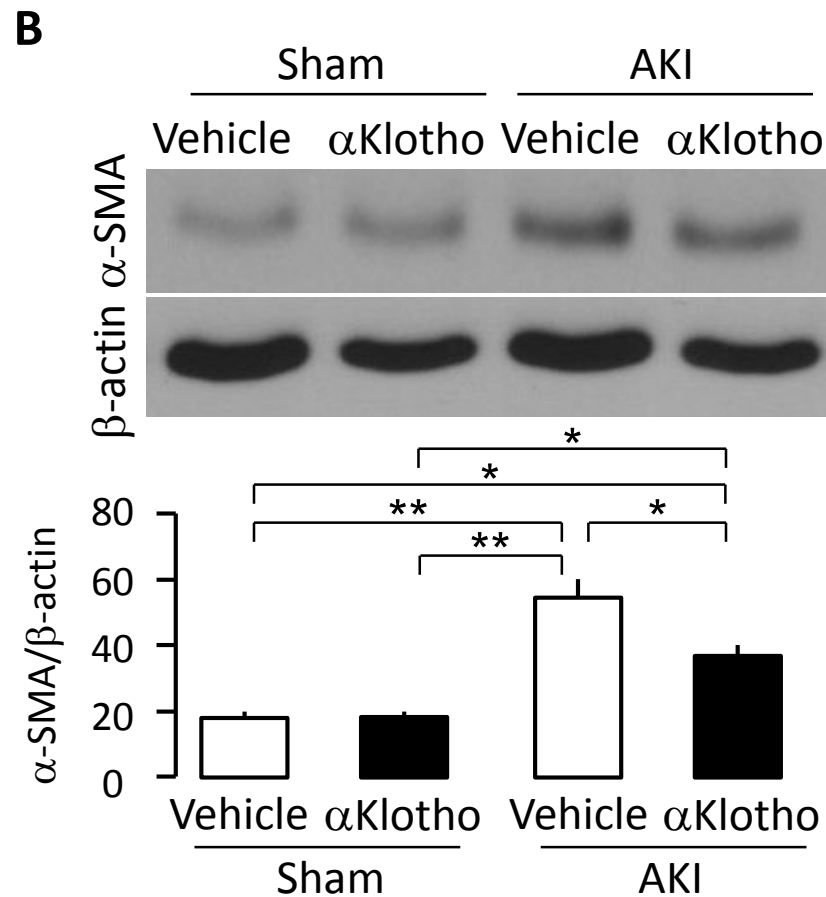

**Supplemental Figure 2**

Supplement: NIHMS902186-supplement-Supplemental_File_1.pdf [file NIHMS902186-supplement-Supplemental_File_1.pdf]
